# Supplementary material
Source: HighWire-hosted journal article supplement (https://bmjopen.bmj.com/content/9/2/e025801)
Supplement: inline-supplementary-material-1 [file inline-supplementary-material-1.pdf]

## Appendix 1: Example search Strategy for Medline+Journals@Ovid

|    |                                                                                                                                                                                                              |
|----|--------------------------------------------------------------------------------------------------------------------------------------------------------------------------------------------------------------|
| 1  | exp STEM CELL RESEARCH/                                                                                                                                                                                      |
| 2  | ("stem cell research\$" or "stem-cell research\$" or "stem cell-based research\$" or "embryonic stem cell research\$").mp.                                                                                   |
| 3  | ("stem cell\$" or "stem-cell" or "stem cell-based").mp.                                                                                                                                                      |
| 4  | (research\$ or therap\$ or treatment\$ or intervention\$ or science\$ or transplant\$ or source\$ or laborator\$ or bank\$ or tourism).mp.                                                                   |
| 5  | ((("stem cell\$" or "stem-cell" or "stem cell-based") adj1 (research\$ or therap\$ or treatment\$ or intervention\$ or science\$ or transplant\$ or source\$ or laborator\$ or bank\$ or tourism))).mp.      |
| 6  | ("cord blood" adj (stem cell\$ or stem cell transplant\$)).mp.                                                                                                                                               |
| 7  | "human embryonic stem cell\$.mp.                                                                                                                                                                             |
| 8  | <b>OR/ 1, 2, 5, 6, 7</b>                                                                                                                                                                                     |
| 9  | exp Students, Medical/                                                                                                                                                                                       |
| 10 | ("health\$ student\$" or "med\$ student\$").mp.                                                                                                                                                              |
| 11 | ((health\$ or medic\$) adj (undergrad\$ or grad\$ postgrad\$ or post-grad\$ or trainee\$)).mp.                                                                                                               |
| 12 | "student doctor".mp.                                                                                                                                                                                         |
| 13 | <b>OR/9-12</b>                                                                                                                                                                                               |
| 14 | exp Students, Nursing/                                                                                                                                                                                       |
| 15 | (nurs\$ adj (student\$ or undergraduate\$)).mp.                                                                                                                                                              |
| 16 | "student nurse".mp.                                                                                                                                                                                          |
| 17 | <b>OR/14-16</b>                                                                                                                                                                                              |
| 18 | exp Health Personnel/                                                                                                                                                                                        |
| 19 | ((medical or health\$ or allied health\$) adj (provider\$ or professional\$ or worker\$ or assistant\$ or administrator\$)).mp.                                                                              |
| 20 | (nurse\$ or "nurs\$ staff" or "staff nurse\$").mp.                                                                                                                                                           |
| 21 | (midwife or midwives or caregiv\$).mp.                                                                                                                                                                       |
| 22 | <b>OR/ 18-21</b>                                                                                                                                                                                             |
| 23 | (clinician\$ or doctor\$ or resident\$ or "trainee doctor\$" or "med\$ specialist\$ or physician\$").mp.                                                                                                     |
| 24 | ("med\$ teacher\$" or "med\$ educator\$").mp.                                                                                                                                                                |
| 25 | (patient\$ or parent\$ or donor\$ or researcher\$ or scientist\$ or ethicist\$ or counsellor\$).mp.                                                                                                          |
| 26 | ("stem cell\$" or "human embryonic stem cell\$").mp.                                                                                                                                                         |
| 27 | 25adj426.mp.                                                                                                                                                                                                 |
| 28 | <b>OR/ 23, 24, 27</b>                                                                                                                                                                                        |
| 29 | <b>OR/ 13, 17, 22, 28</b>                                                                                                                                                                                    |
| 30 | (perception\$ or thought\$ or knowledge or perspective\$ or attitude\$ or opinion\$ or idea\$ or "point of view" or belie\$ or viewpoint\$ or understanding\$ or representation\$ or narrat\$ or stor\$).mp. |
| 31 | <b>AND /8, 29, 30</b>                                                                                                                                                                                        |
| 32 | <b>limit 31 to yr="2000 - 2017"</b>                                                                                                                                                                          |
| 33 | <b>limit 32 to (Chinese or English or Slovene or Spanish)</b>                                                                                                                                                |
